# Supplementary material
Source: HighWire-hosted journal article supplement (https://ajnr-sso.highwirestaging.com/highwire/filestream/913/field_highwire_adjunct_files/0/3224_table.pdf)
Supplement: 3224_table.pdf [file 3224_table.pdf]

**On-line Table: Summary of cases resulting in mortality**

| Mortality | Clinical Presentation                      | Aneurysm Location             | Aneurysm Morphology                      | Mortality Cause<br>(Days from PED Insertion)                                                                                                                                                                |
|-----------|--------------------------------------------|-------------------------------|------------------------------------------|-------------------------------------------------------------------------------------------------------------------------------------------------------------------------------------------------------------|
| 1         | Incidental                                 | Posterior inferior cerebellar | 25 mm, incorporated PICA                 | Delayed aneurysm rupture with brain stem hemorrhage (11 days)                                                                                                                                               |
| 2         | Recurrence of previously ruptured aneurysm | Supraclinoid carotid          | 12 mm, recurrence after coiling          | Initially only on clopidogrel due to ASA allergy. Developed embolic infarction. ASA started using a desensitizing protocol in intensive care. Developed a massive distal intracerebral hemorrhage (14 days) |
| 3         | Previously treated contralateral aneurysm  | Supraclinoid carotid          | 4 discrete aneurysms ranging from 4–8 mm | Developed an infected femoral artery pseudoaneurysm, gastrointestinal hemorrhage, followed by SAH from new infectious intracranial aneurysms with sepsis and multiorgan failure (22 days)                   |
| 4         | Visual field deficit, aortic aneurysms     | Basilar trunk                 | 24 mm, fusiform                          | Small perforator infarct with hemiparesis after treatment with 5 stents. Prolonged complicated course in hospital with pneumonia, sepsis, colitis. Died in long-term care (100 days)                        |
| 5         | Headaches, nausea, vomiting                | Basilar termination           | 40 mm, partly thrombosed                 | Abrupt deterioration due to herniation. Imaging demonstrated acute aneurysm thrombosis and hydrocephalus with a trace of SAH. Autopsy revealed multiple intraperitoneal metastatic tumor deposits (4 days)  |
| 6         | Brain stem compression, hemiplegia         | Basilar termination           | 24 mm, partly thrombosed                 | Progressive aneurysm growth despite second coiling procedure. Death due to progressive mass effect and associated medical complications (347 days)                                                          |

**Note:**—ASA indicates acetylsalicylic acid.
